# Supplementary material
Source: PubMed Central journal article supplement (PMC4979611)
Supplement: NIHMS803535-supplement-Author_Addition_Agreements.pdf [file NIHMS803535-supplement-Author_Addition_Agreements.pdf]

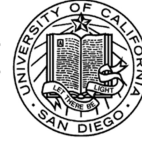

**JU CHEN, Ph.D.**  
PROFESSOR OF MEDICINE  
SCHOOL OF MEDICINE  
AHA ENDOWED CHAIR  
DIRECTOR OF BASIC CARDIAC RESEARCH

9500 GILMAN DRIVE  
LA JOLLA, CALIFORNIA 92093-0613C  
TEL: +1 (858) 822-4276  
FAX: +1 (858) 534-2069  
EMAIL: [juchen@ucsd.edu](mailto:juchen@ucsd.edu)  
WEB: <http://juchenlab.ucsd.edu>

June 22, 2016

Dear Professor Kirshenbaum,

This letter is to confirm that as authors of the manuscript entitled "Postnatal loss of Kindlin-2 leads to progressive heart failure" (CIRCHF/2016/003129R1), we all agree to the addition of three further authors, Kirk U. Knowlton, Angela K. Peter, and William H. Bradford, who have contributed significantly to the study but were accidentally omitted from the original submission.

Zhiyuan Zhang

Handwritten signature of Zhiyuan Zhang in black ink, written over a horizontal line.

Yongxin Mu

Handwritten signature of Yongxin Mu in black ink, written over a horizontal line.

Jennifer Veevers

Handwritten signature of Jennifer Veevers in black ink, written over a horizontal line.

Ana Maria Manso

Handwritten signature of Ana Maria Manso in black ink, written over a horizontal line.

Nancy D. Dalton

Handwritten signature of Nancy D. Dalton in black ink, written over a horizontal line.

Kirk L. Peterson

Handwritten signature of Kirk L. Peterson in black ink, written over a horizontal line.

Robert S. Ross

Handwritten signature of Robert S. Ross in blue ink, written over a horizontal line.

Xinmin Zhou

Handwritten signature of Xinmin Zhou in black ink, written over a horizontal line.

Ju Chen

Handwritten signature of Ju Chen in black ink, written over a horizontal line.

Sincerely,

Ju Chen, Ph.D.  
Professor of Medicine
