# Supplementary material
Source: PubMed Central journal article supplement (PMC4979611)
Supplement: NIHMS803535-supplement-Supplemental_Material.pdf [file NIHMS803535-supplement-Supplemental_Material.pdf]

## Supplemental Material

# Supplementary Figure 1.

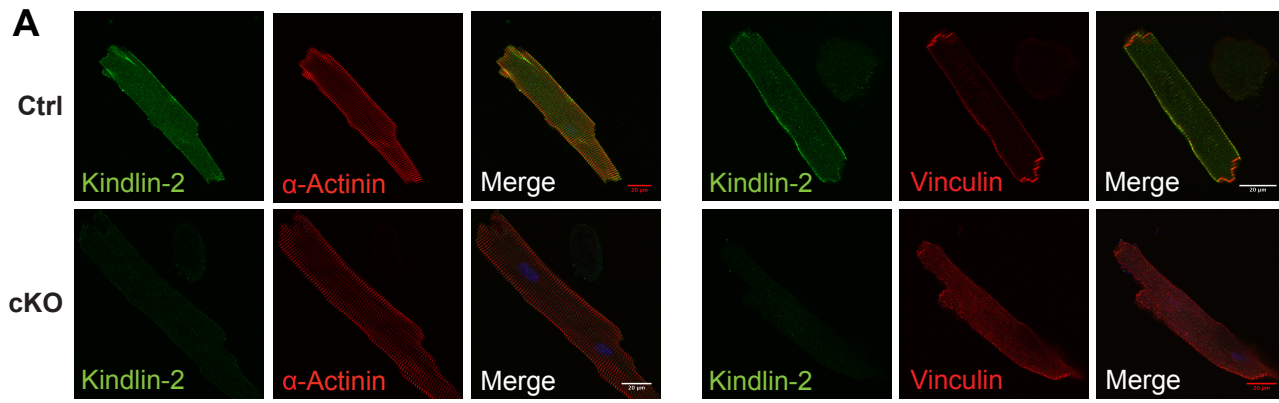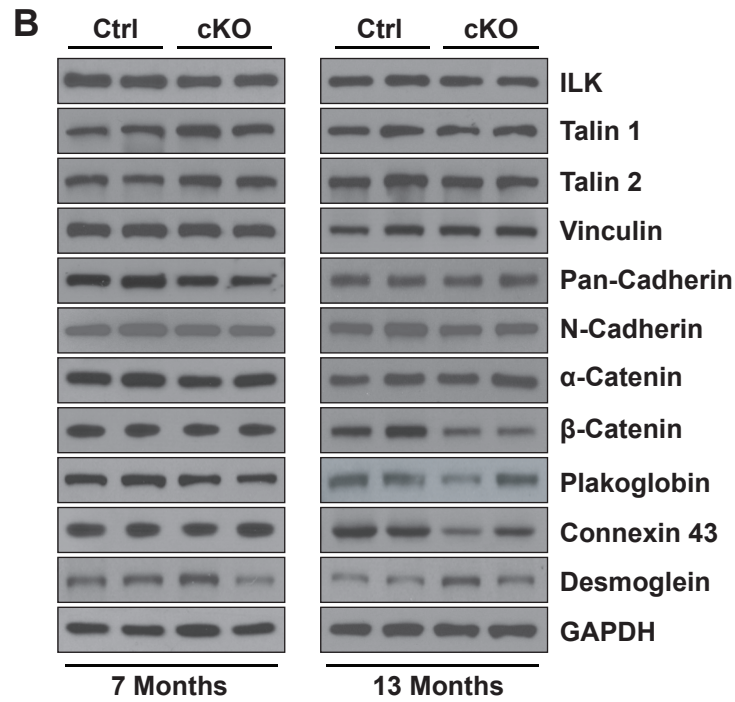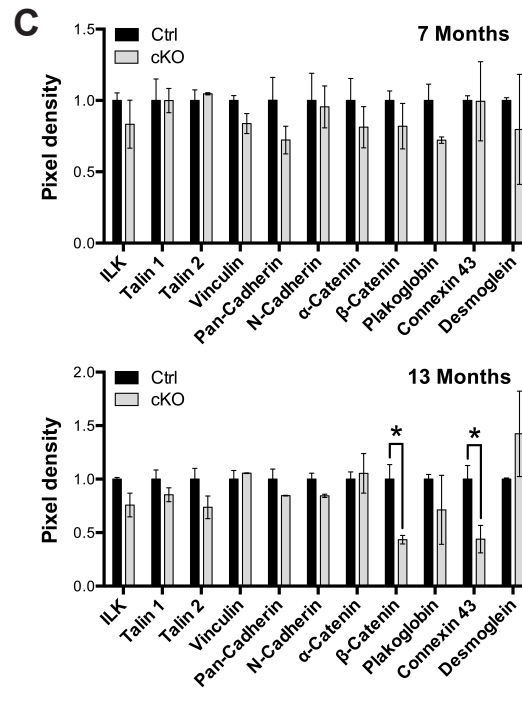

**Supplementary Figure 1. Kindlin-2 is localized at the costamere, and loss of Kindlin-2 does not alter protein expression or localization of intercalated disc components**

(A) Immunofluorescence analysis of Kindlin-2 (green) and  $\alpha$ -Actinin (red, left) and Vinculin (red, right) in cardiomyocytes isolated from control (Ctrl) and Kindlin-2<sup>fl/fl</sup>;  $\beta$ -MHC Cre knockout (cKO) mice at 5 months (scale bar: 20  $\mu$ m). DNA is stained with DAPI (blue). (B) Western blot and (C) corresponding quantitative densitometric analysis of indicated proteins in Ctrl and cKO mouse hearts, at 7 and 13 months. ILK, integrin-linked kinase. GAPDH served as a loading control. Pixel density is normalized to the level of GAPDH (\* $P$ <0.05, two-tailed Student's  $t$ -test). A representative example of at least two independent experiments is shown (n=2 per genotype/experiment).

**Supplementary Table 1. Primer sequences used for qRT-PCR analysis**

| <b>Gene</b>                            | <b>Forward Primer (5'-3')</b> | <b>Reverse Primer (5'-3')</b> |
|----------------------------------------|-------------------------------|-------------------------------|
| <b><i>Col1<math>\alpha</math>1</i></b> | TCACCAAACCTCAGAAGATGTAGGA     | GACCAGGAGGACCAGGAAG           |
| <b><i>Col3<math>\alpha</math>1</i></b> | ACAGCAGTCCAACGTAGATGAAT       | TCACAGATTATGTCATCGCAAAG       |
| <b><i>ANF</i></b>                      | GATAGATGAAGGCAGGAAGCCGC       | AGGATTGGAGCCCAGAGTGGACTAGG    |
| <b><i>BNP</i></b>                      | TGTTTCTGCTTTTCCTTTATCTGTC     | CTCCGACTTTTCTCTTATCAGCTC      |
| <b><i><math>\beta</math>1D</i></b>     | CAAGTGGGACACGCAAGAAA          | CGTCCATAGTTTGGATTCTTGAAAT     |
| <b><i>18S</i></b>                      | GGAAGGGCACCACCAGGAGT          | TGCAGCCCCGGACATCTAAG          |

*Col1 $\alpha$ 1*, collagen alpha 1 type I; *Col3 $\alpha$ 1*, collagen alpha1 type III; *ANF*, atrial natriuretic factor;

*BNP*, B-type natriuretic peptide;  *$\beta$ 1D*, integrin  $\beta$ 1D; *18S*, 18S ribosomal RNA.
